# Supplementary material for: Dual role of carcinoembryonic antigen-related cell adhesion molecule 6 expression in predicting the overall survival of gastric cancer patients
Source: PubMed Central journal article supplement (PMC5589957; doi:10.1038/s41598-017-11482-9), 2017-09-07
Supplement: 41598_2017_11482_MOESM1_ESM.pdf [file 41598_2017_11482_MOESM1_ESM.pdf]

**Title: Dual role of carcinoembryonic antigen-related cell adhesion molecule 6 expression in predicting the overall survival of gastric cancer patients.**

**Authors:** Mingde Zang<sup>1,\*</sup>, Lei Hu<sup>1,\*</sup>, Shu Cao<sup>1</sup>, Zhiyuan Fan<sup>1</sup>, Li Pang<sup>1</sup>, Jianfang Li<sup>1</sup>, Liping Su<sup>1</sup>, Chen Li<sup>1</sup>, Wentao Liu<sup>1</sup>, Qinlong Gu<sup>1</sup>, Zhenggang Zhu<sup>1</sup>, Min Yan<sup>1</sup>, Bingya Liu<sup>1,†</sup>

**Affiliate:** <sup>1</sup>Department of General Surgery, Shanghai Key Laboratory of Gastric Neoplasms, Shanghai Institute of Digestive Surgery, Ruijin Hospital, Shanghai Jiao Tong University School of Medicine, Shanghai 200025, People's Republic of China.

\* These authors contributed equally to this work.

†**Corresponding author:** Bingya Liu; E-mail: [liubingya@sjtu.edu.cn](mailto:liubingya@sjtu.edu.cn); Tel: 86-21-64670644; Fax: 86-21-64393909.

## Supplementary figures

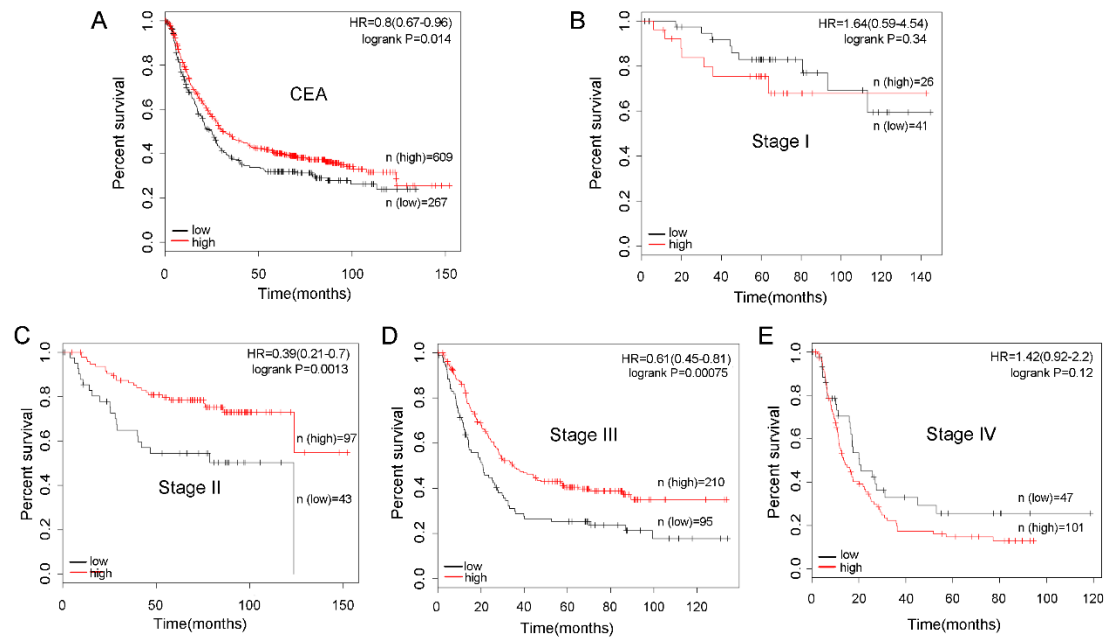

**Supplementary figure S1. Role of CEA expression in predicting the overall survival in patients with gastric cancer.** Kaplan-Meier curves of overall survival according to (A) CEA expression, (B) CEA expression in Stage I GC, (C) CEA expression in Stage II GC, (D) CEA expression in Stage III GC, and (E) CEA expression in Stage IV GC.

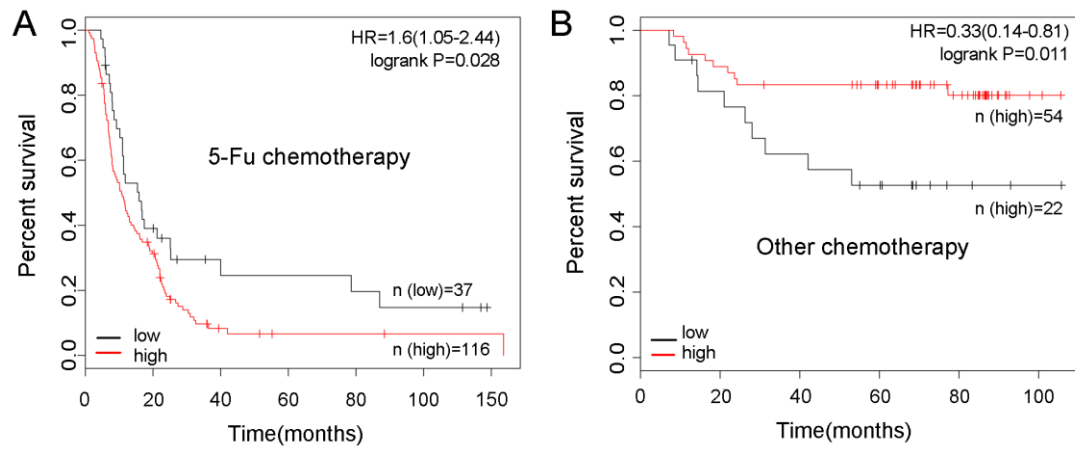

**Supplementary figure S2. Role of CEA expression, and chemotherapy with 5-fluorouracil in predicting overall survival in patients with gastric cancer.** Kaplan-Meier curves of OS according to CEA expression in patients who were treated with adjuvant chemotherapy (**A**) with and (**B**) without 5-fluorouracil.

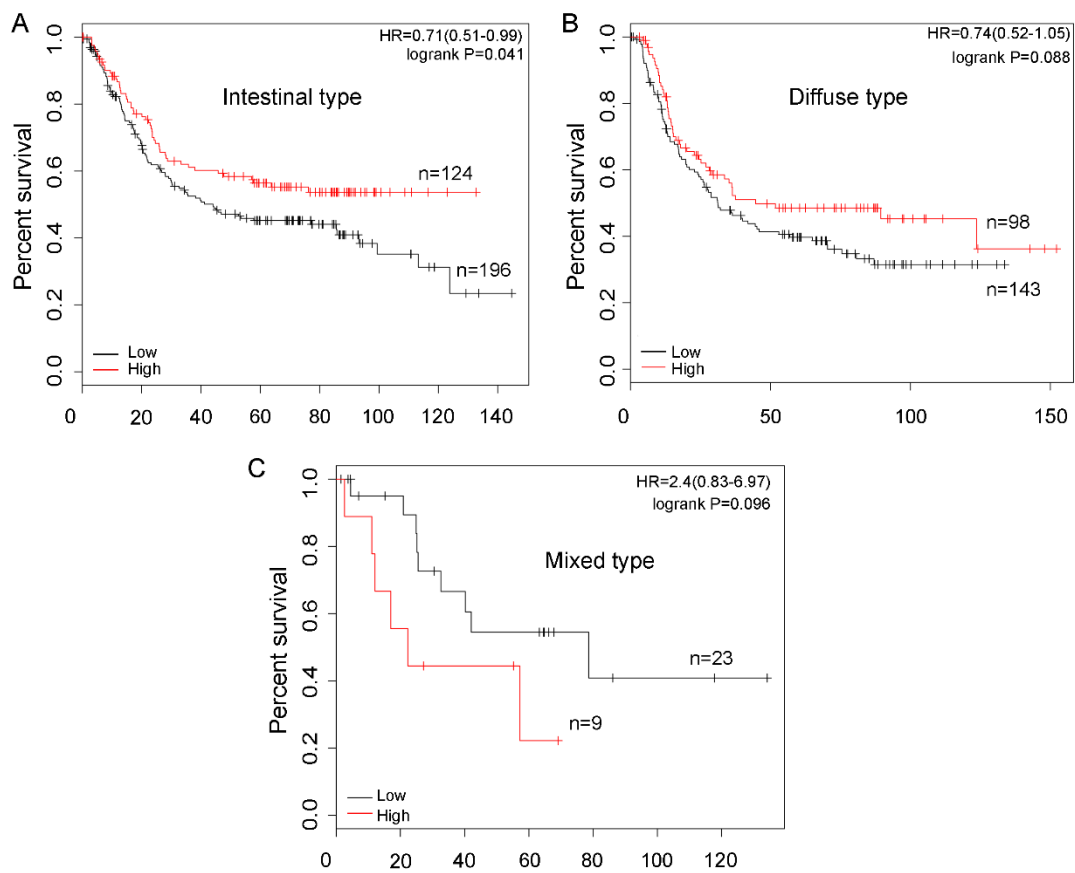

**Supplementary figure S3. Role of CEACAM6 expression in predicting the overall survival in patients with gastric cancer.** Kaplan-Meier curves of OS according to (A) CEACAM6 expression in intestinal-type GC, (B) CEACAM6 expression in diffuse-type GC, (C) CEACAM6 expression in mixed-type GC.

## Supplementary table

**Table S1. Association between CEA expression and overall survival of gastric cancer patients (n=876) (data from <http://kmplot.com/analysis/>)**

| Parameters           |      | Cases | Median Survival(months) | HR(95%CI)        | P value        |
|----------------------|------|-------|-------------------------|------------------|----------------|
| All patients         | Low  | 267   | 24.9                    | 0.8 (0.67-0.96)  | <b>0.014</b>   |
|                      | High | 609   | 31                      |                  |                |
| I                    | Low  | 41    | 93.2                    | 1.64 (0.59-4.54) | 0.34           |
|                      | High | 26    | 63.7                    |                  |                |
| II                   | Low  | 43    | 25.5                    | 0.39 (0.21 -0.7) | <b>0.0013</b>  |
|                      | High | 97    | 85.8                    |                  |                |
| III                  | Low  | 95    | 20.9                    | 0.61 (0.45-0.81) | <b>0.00075</b> |
|                      | High | 210   | 35.1                    |                  |                |
| IV                   | Low  | 47    | 20.3                    | 1.42 (0.92-2.2)  | 0.12           |
|                      | High | 101   | 13.73                   |                  |                |
| 5-Fu chemotherapy    | Low  | 37    | 15.9                    | 1.6 (1.05-2.44)  | <b>0.028</b>   |
|                      | High | 116   | 10.7                    |                  |                |
| No 5-Fu chemotherapy | Low  | 22    | NA                      | 0.33 (0.14-0.81) | <b>0.011</b>   |
|                      | High | 54    | NA                      |                  |                |

NA: Not Available. HR: Hazard Ratio.
